# Supplementary material for: Novel Tetraploid Triticale (Einkorn Wheat × Rye)—A Source of Stem Rust Resistance
Source: MDPI journal article supplement (doi:10.3390/plants12020278), 2023-01-07
Supplement: s1 [file s1]

**Supplementary Table S1.** Statistics, analysis of variance followed by Tukey's Honest Significant Difference test (HSD) for infection test scores of sixty plants of S<sub>4</sub> generation; 30 plants of control genotypes: *T. aestivum* "Thatcher", (susceptible control) and *T. aestivum* Thatcher+Sr57 (moderate resistant control).

| Summary values                                                                                       |            | 1                                                                        | 2                                 | 3                             |
|------------------------------------------------------------------------------------------------------|------------|--------------------------------------------------------------------------|-----------------------------------|-------------------------------|
|                                                                                                      |            | A <sup>m</sup> A <sup>m</sup> RR amphiploids (S <sub>4</sub> generation) | <i>T. aestivum</i> Thatcher+ Sr57 | <i>T. aestivum</i> "Thatcher" |
| Number of samples                                                                                    |            | 60                                                                       | 30                                | 30                            |
| Mean                                                                                                 |            | 0.45                                                                     | 1.43                              | 3.87                          |
| Range                                                                                                |            | 0-1                                                                      | 1-2                               | 3-4                           |
| Variance                                                                                             |            | 0.124576                                                                 | 0.2254023                         | 0.11954                       |
| Standard deviation                                                                                   |            | 0.352954                                                                 | 0.504007                          | 0.345746                      |
| Standard error                                                                                       |            | 0.045566                                                                 | 0.092019                          | 0.063124                      |
| <b>Analysis of variance (ANOVA) – treatment between groups</b>                                       |            |                                                                          |                                   |                               |
| F-value                                                                                              |            | 752.89                                                                   |                                   |                               |
| P-value                                                                                              |            | <0.0001                                                                  |                                   |                               |
| <b>Tukey's Highest Significant Difference (HSD) between any two sample means at designated level</b> |            |                                                                          |                                   |                               |
| 1 vs2                                                                                                |            | P < 0.01                                                                 |                                   |                               |
| 1vs 3                                                                                                |            | P < 0.01                                                                 |                                   |                               |
| 2vs3                                                                                                 |            | P < 0.01                                                                 |                                   |                               |
| <b>Significance level</b>                                                                            | HSD [0.05] | 0.22                                                                     |                                   |                               |
|                                                                                                      | HSD [0.01] | 0.28                                                                     |                                   |                               |
